# Supplementary material for: Charge transfer complexes of metal-free phthalocyanine radical anions with decamethylmetallocenium cations: (Cp*2Co+)(H2Pc˙−)·solvent and (Cp*2Cr+)(H2Pc˙−)·4C6H4Cl2
Source: Royal Society of Chemistry journal article supplement (doi:10.1039/c7dt00336f), 2017-01-01
Supplement: c7dt00336f1.pdf [file c7dt00336f1.pdf]

**Supporting information.**

**IR- spectra.**

**Table S1.** IR-spectra (cm<sup>-1</sup> in KBr) of starting compounds and complexes **1** and **2**.

| Components         | Cp* <sub>2</sub> Cr | Cp* <sub>2</sub> Co | H <sub>2</sub> Pc | (Cp* <sub>2</sub> Co <sup>+</sup> )(H <sub>2</sub> Pc <sup>-</sup> )·0.5<br>C <sub>6</sub> H <sub>4</sub> Cl <sub>2</sub> ·0.7C <sub>6</sub> H <sub>5</sub> CN·0.3C <sub>6</sub> H <sub>14</sub> ( <b>1</b> ) | (Cp* <sub>2</sub> Cr <sup>+</sup> )(H <sub>2</sub> Pc <sup>-</sup> )·4C <sub>6</sub> H <sub>4</sub> Cl <sub>2</sub><br>( <b>2</b> ) |      |
|--------------------|---------------------|---------------------|-------------------|---------------------------------------------------------------------------------------------------------------------------------------------------------------------------------------------------------------|-------------------------------------------------------------------------------------------------------------------------------------|------|
| Cp* <sub>2</sub> M | 418w                | 446w                |                   | 436w                                                                                                                                                                                                          | 437w                                                                                                                                |      |
|                    | 1021s               | 1025s               |                   | 1022m*                                                                                                                                                                                                        | 1034m*                                                                                                                              |      |
|                    | 1060w               | 1078m               |                   | 1048s 1070m 1080s                                                                                                                                                                                             | 1044m                                                                                                                               |      |
|                    | 1316s               | 1314s               |                   | 1323s*                                                                                                                                                                                                        | 1319m*                                                                                                                              |      |
|                    | 1375s               | 1376m               |                   | 1374m                                                                                                                                                                                                         | -                                                                                                                                   |      |
|                    | -                   | -                   |                   | 1381m                                                                                                                                                                                                         | 1381m                                                                                                                               |      |
|                    | 1413w               | 1424w               |                   | -                                                                                                                                                                                                             | -                                                                                                                                   |      |
|                    | 1448w               | 1472m               |                   | 1444s*                                                                                                                                                                                                        | 1438s                                                                                                                               |      |
|                    | 1610m               | 1617s               |                   | 1636w                                                                                                                                                                                                         | 1636w                                                                                                                               |      |
|                    | 2906w               | 2904w               |                   | 2917w                                                                                                                                                                                                         | 2917w                                                                                                                               |      |
|                    | 2962w               | 2960w               |                   | -                                                                                                                                                                                                             | 2972m                                                                                                                               |      |
|                    | H <sub>2</sub> Pc   |                     |                   | 443w                                                                                                                                                                                                          | 441w                                                                                                                                | 451w |
|                    |                     |                     |                   | 487w                                                                                                                                                                                                          | 489w                                                                                                                                | 480m |
|                    |                     |                     |                   | 556w                                                                                                                                                                                                          | -                                                                                                                                   | -    |
|                    |                     |                     | 614w              | 617m                                                                                                                                                                                                          | 618m                                                                                                                                |      |
|                    |                     |                     | 684w              | -                                                                                                                                                                                                             | -                                                                                                                                   |      |
|                    |                     |                     | 717s              | 712m                                                                                                                                                                                                          | 710s                                                                                                                                |      |
|                    |                     |                     | 729s              | 718m                                                                                                                                                                                                          | 728s*                                                                                                                               |      |
|                    |                     |                     | 735s              | 729s*                                                                                                                                                                                                         | 735s                                                                                                                                |      |
|                    |                     |                     | 751m              | 766m                                                                                                                                                                                                          | 756m                                                                                                                                |      |
|                    |                     |                     | 873m              | 873m                                                                                                                                                                                                          | 872m                                                                                                                                |      |
|                    |                     |                     | -                 | 948w                                                                                                                                                                                                          | 948w                                                                                                                                |      |
|                    |                     |                     | 1004s             | 1003m                                                                                                                                                                                                         | 1004m                                                                                                                               |      |
|                    |                     |                     | 1093m             | 1093m                                                                                                                                                                                                         | 1090s\                                                                                                                              |      |
|                    |                     |                     | 1109m             | 1109s                                                                                                                                                                                                         | 1110s                                                                                                                               |      |
|                    |                     |                     | 1118s             | -                                                                                                                                                                                                             | -                                                                                                                                   |      |
|                    |                     |                     | 1158w             | 1158w                                                                                                                                                                                                         | 1161w                                                                                                                               |      |
|                    |                     |                     | 1276m             | 1276m                                                                                                                                                                                                         | 1277m                                                                                                                               |      |
|                    |                     |                     | 1303m             | 1307m                                                                                                                                                                                                         | -                                                                                                                                   |      |
|                    |                     |                     | 1321m             | 1323s*                                                                                                                                                                                                        | 1319m*19m*                                                                                                                          |      |
|                    |                     |                     | 1334m             | 1332s                                                                                                                                                                                                         | 1334s                                                                                                                               |      |
|                    |                     |                     | 1437m             | 1444s*                                                                                                                                                                                                        | 1446s                                                                                                                               |      |
|                    |                     |                     | 1457w             | 1455s*                                                                                                                                                                                                        | 1456s*                                                                                                                              |      |
|                    |                     |                     | 1477w             | 1486s                                                                                                                                                                                                         | -                                                                                                                                   |      |
|                    |                     | 1501m               | -                 | -                                                                                                                                                                                                             |                                                                                                                                     |      |
|                    |                     | 3047w               | 3048w             | 3048w                                                                                                                                                                                                         |                                                                                                                                     |      |
|                    |                     | -                   | 3122w             | -                                                                                                                                                                                                             |                                                                                                                                     |      |
| Solvents           |                     |                     | 3274w (N-H)       | 3299w (N-H)                                                                                                                                                                                                   | 3301w (N-H)                                                                                                                         |      |
|                    |                     |                     |                   | C <sub>6</sub> H <sub>4</sub> Cl <sub>2</sub>                                                                                                                                                                 | C <sub>6</sub> H <sub>4</sub> Cl <sub>2</sub>                                                                                       |      |
|                    |                     |                     |                   | 658w                                                                                                                                                                                                          | 659w                                                                                                                                |      |
|                    |                     |                     |                   | 729s*                                                                                                                                                                                                         | 728s*                                                                                                                               |      |
|                    |                     |                     |                   | 1022m*                                                                                                                                                                                                        | 1034m*                                                                                                                              |      |
|                    |                     |                     | 1455s*            | 1456s*                                                                                                                                                                                                        |                                                                                                                                     |      |

\* Bands are overlapped, w-weak intensity, m – middle intensity, s – strong intensity

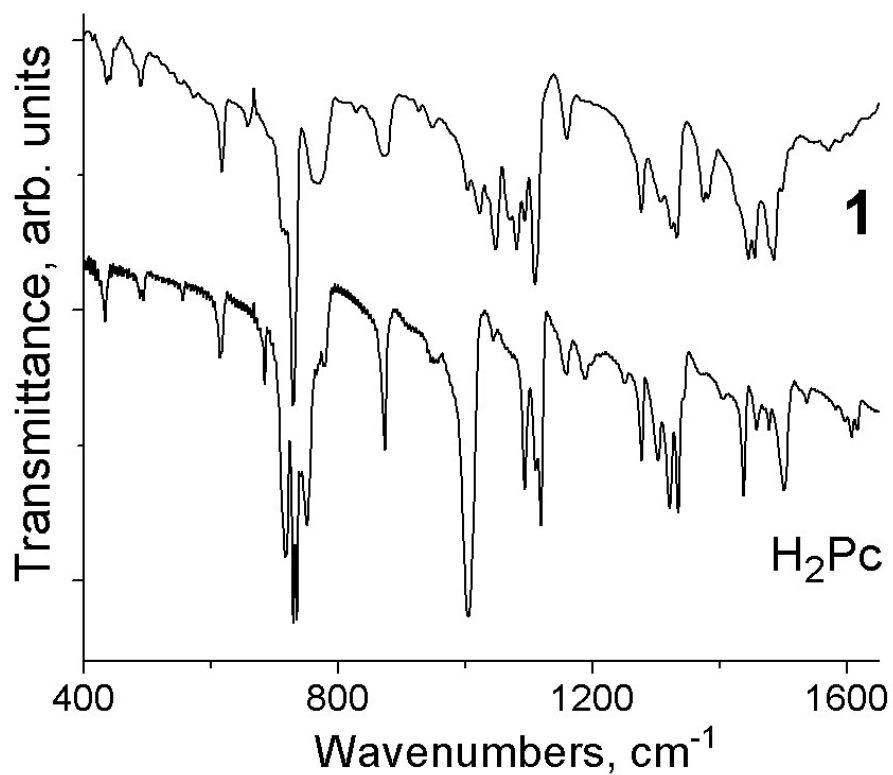

**Fig. S1.** IR spectrum of complex  $(\text{Cp}^*_2\text{Co}^+)(\text{H}_2\text{Pc}^{\bullet-}) \cdot 0.5\text{C}_6\text{H}_4\text{Cl}_2 \cdot 0.7\text{C}_6\text{H}_5\text{CN} \cdot 0.3\text{C}_6\text{H}_{14}$  (**1**) measure in KBr pellet prepared in anaerobic conditions.

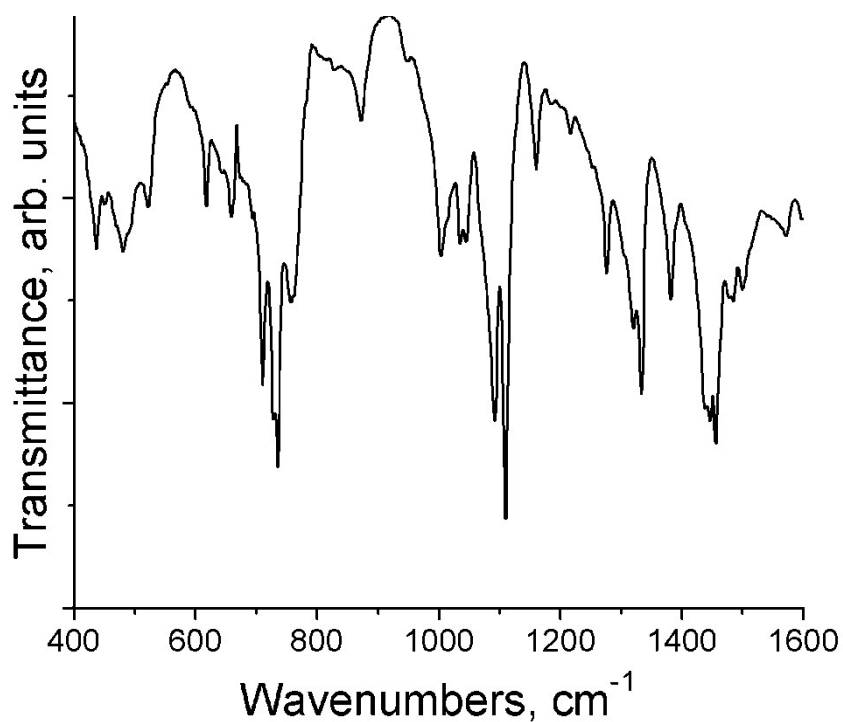

**Fig. S2.** IR spectrum of  $(\text{Cp}^*_2\text{Cr}^+)(\text{H}_2\text{Pc}^{\bullet-}) \cdot 4\text{C}_6\text{H}_4\text{Cl}_2$  (**2**) measure in KBr pellet prepared in anaerobic conditions.
